# Supplementary material
Source: PubMed Central journal article supplement (PMC4154497)
Supplement: NIHMS589946-supplement-2.pdf [file NIHMS589946-supplement-2.pdf]

**Supplementary Table S1. Genes whose expression is anti-correlated with PLX4720 IC<sub>50</sub> in the CCLE dataset.**

| Gene         | Pearson correlation | Anti-correlation rank |
|--------------|---------------------|-----------------------|
| MITF         | -0.7838             | 1                     |
| RNF144A      | -0.76041            | 2                     |
| MLANA        | -0.74993            | 3                     |
| MXI1         | -0.74011            | 4                     |
| CAPN3        | -0.73785            | 5                     |
| RRAGD        | -0.73391            | 6                     |
| GPM6B        | -0.73376            | 7                     |
| PECR         | -0.73144            | 8                     |
| MREG         | -0.73105            | 9                     |
| C10orf108    | -0.72985            | 10                    |
| ANKRD44      | -0.728              | 11                    |
| GALNT3       | -0.72114            | 12                    |
| GNPTAB       | -0.72003            | 13                    |
| DIP2B        | -0.71962            | 14                    |
| TESK2        | -0.7189             | 15                    |
| PI15         | -0.71342            | 16                    |
| WDR61        | -0.71323            | 17                    |
| SLC25A33     | -0.71294            | 18                    |
| QDPR         | -0.71132            | 19                    |
| BAHCC1       | -0.7054             | 20                    |
| CPN1         | -0.70512            | 21                    |
| C14orf109    | -0.69932            | 22                    |
| C17orf58     | -0.69724            | 23                    |
| LGALS3       | -0.69096            | 24                    |
| FGD4         | -0.68849            | 25                    |
| PLEKHH1      | -0.6872             | 26                    |
| TNFRSF14     | -0.68241            | 27                    |
| FAM210A      | -0.68208            | 28                    |
| RXRG         | -0.67899            | 29                    |
| MAD2L1BP     | -0.67836            | 30                    |
| HS1BP3       | -0.67735            | 31                    |
| RAB38        | -0.67563            | 32                    |
| FMN1         | -0.67334            | 33                    |
| CITED1       | -0.67046            | 34                    |
| PIR          | -0.66633            | 35                    |
| DTWD2        | -0.6663             | 36                    |
| TBC1D22A     | -0.6655             | 37                    |
| ZNF704       | -0.66431            | 38                    |
| TRIM63       | -0.66027            | 39                    |
| DCT          | -0.65823            | 40                    |
| PDZRN3       | -0.65668            | 41                    |
| DDT          | -0.65663            | 42                    |
| ST3GAL6      | -0.65006            | 43                    |
| PRR5         | -0.64959            | 44                    |
| ESRP1        | -0.64921            | 45                    |
| AP1S2        | -0.64918            | 46                    |
| CHCHD6       | -0.64886            | 47                    |
| RAI1         | -0.64704            | 48                    |
| KCNN2        | -0.64672            | 49                    |
| PIK3CB       | -0.64549            | 50                    |
| PLA1A        | -0.64521            | 51                    |
| PROS1        | -0.64258            | 52                    |
| PPFIA1       | -0.64135            | 53                    |
| ZFYVE16      | -0.64127            | 54                    |
| PMEL         | -0.6409             | 55                    |
| SPSB1        | -0.64052            | 56                    |
| LAMA1        | -0.64028            | 57                    |
| MOAP1        | -0.63884            | 58                    |
| TTYH2        | -0.63777            | 59                    |
| LOC100653010 | -0.63742            | 60                    |
| GRAMD4       | -0.63352            | 61                    |
| STXBP1       | -0.63344            | 62                    |
| TBC1D16      | -0.6333             | 63                    |
| SLC45A2      | -0.62943            | 64                    |
| D4S234E      | -0.62808            | 65                    |
| LOC100506661 | -0.62786            | 66                    |
| C11orf96     | -0.62655            | 67                    |
| KIAA1598     | -0.62583            | 68                    |
| USP54        | -0.62419            | 69                    |
| RASSF3       | -0.62408            | 70                    |
| EDNRB        | -0.62387            | 71                    |
| TIMM50       | -0.62239            | 72                    |
| SIRPA        | -0.62106            | 73                    |
| ANKRD54      | -0.62014            | 74                    |
| KIAA0226L    | -0.62014            | 75                    |

**Supplementary Table S2. Pre-treatment immunohistochemistry results and progression-free survival following dabrafenib + trametinib therapy.**

| sample | PFS (mo) | MITF staining |           | AXL staining |           |
|--------|----------|---------------|-----------|--------------|-----------|
|        |          | distribution  | intensity | distribution | intensity |
| R4     | 5        | diffuse       | 2         | negative     | 0         |
| R9     | 12       | diffuse       | 1         | negative     | 0         |
| 6A     | 21       | diffuse       | 3         | negative     | 0         |
| 19A    | 17       | diffuse       | 2         | negative     | 0         |
| 9A     | 7        | negative      | 0         | diffuse      | 2         |
| R8     | 2        | negative      | 0         | focal        | 2         |
| R10    | 3        | negative      | 0         | focal        | 2         |
| 11A    | 10       | negative      | 0         | focal        | 2         |
| 13A    | 9        | negative      | 0         | diffuse      | 2         |
| 22A    | 3        | negative      | 0         | focal        | 2         |
| 25A    | 3        | negative      | 0         | focal        | 2         |
| 12A    | 12       | negative      | 0         | diffuse      | 2         |
